# Supplementary material for: Identification and Functional Analysis of Trypanosoma cruzi Genes That Encode Proteins of the Glycosylphosphatidylinositol Biosynthetic Pathway
Source: PubMed Central journal article supplement (PMC3738449; doi:10.1371/journal.pntd.0002369), 2013-08-08
Supplement: pntd.0002369.s005.pdf [file pntd.0002369.s005.pdf]

| Primers                                  | Sequences                                                                                                                                                                                                                                                                                                                                                                                                                                                                                                                                                                                                                                                                                                                                                                                                                                                                                                                                                                                                                                                                                                                                                                                                                                                                                                                                                                                                                                                                                                                                                                                                                                                                                                                                                                                                                                                                                                                                                      |
|------------------------------------------|----------------------------------------------------------------------------------------------------------------------------------------------------------------------------------------------------------------------------------------------------------------------------------------------------------------------------------------------------------------------------------------------------------------------------------------------------------------------------------------------------------------------------------------------------------------------------------------------------------------------------------------------------------------------------------------------------------------------------------------------------------------------------------------------------------------------------------------------------------------------------------------------------------------------------------------------------------------------------------------------------------------------------------------------------------------------------------------------------------------------------------------------------------------------------------------------------------------------------------------------------------------------------------------------------------------------------------------------------------------------------------------------------------------------------------------------------------------------------------------------------------------------------------------------------------------------------------------------------------------------------------------------------------------------------------------------------------------------------------------------------------------------------------------------------------------------------------------------------------------------------------------------------------------------------------------------------------------|
| RT-PCR (yeast mutants)                   | <p>TcGPI8 F: 5' CTCGAATTCATGAGCAACAAAACAAAGACAAAC 3'</p> <p>TcGPI8 R: 5' GCTCTCGAGCAGCAGGTCATATTGTACATC 3'</p> <p>TcIPCS F: 5' GGGGAATTCATGGTTTTAATGGGGCCTCATTC 3'</p> <p>TcIPCS R: 5' TCTCTCGAGTACCAGTGTCCAAAATCCCAC 3'</p> <p>ScGPI8 F: 5' TTTGGATCCATGCGTATAGCGATGCATCT 3'</p> <p>ScGPI8 R: 5' GGCAAGCTTTTAATTAGTGTACAGGTCATA 3'</p> <p>ScAUR1 F: 5' TCTACTAGTATGGCAAACCCCTTTTTCGAGATG 3'</p> <p>ScAUR1 R: 5' GCGAAGCTTTTAAGCCCTCTTTACACCTAGTG 3'</p> <p>26 rRNA F: 5' GCATATCAATAAGCGGAGGAAAAG 3'</p> <p>26 rRNA R: 5' GGTCCGTGTTTCAAGACGG 3'</p>                                                                                                                                                                                                                                                                                                                                                                                                                                                                                                                                                                                                                                                                                                                                                                                                                                                                                                                                                                                                                                                                                                                                                                                                                                                                                                                                                                                                          |
| RT-PCR (parasites)                       | <p>GPI8int 5'R2: 5' ATGAGAGTTTTTCATCCGTGTTGAG 3' (cDNA)</p> <p>GPI8int 5'R: 5' GGCGTATATTAAGAAGTAGCGTGA 3' (PCR)</p> <p>TcSL: 5' ACAGTTTCTGACTATATTG 3' (PCR)</p>                                                                                                                                                                                                                                                                                                                                                                                                                                                                                                                                                                                                                                                                                                                                                                                                                                                                                                                                                                                                                                                                                                                                                                                                                                                                                                                                                                                                                                                                                                                                                                                                                                                                                                                                                                                              |
| Transformation of yeast mutants          | <p>pRS TcDPM1 F: 5' CGGATCCATGCCAATCAGCTACAC 3'</p> <p>pRS TcDPM1 R: 5' AAGCTTCTACACGACCTGTTTCCAC 3'</p> <p>pRS TcGPI3 F: 5' GGGATCCATGGGAAGACACCGCGTG 3'</p> <p>pRS TcGPI3 R: 5' AAAGCTTTCAAACACCCCTTCTCAAGAG 3'</p> <p>pRS TcGPI8 F: 5' CCCGGGATGAAGCGTCAGATGGG 3'</p> <p>pRS TcGPI8 R: 5' CAAGCTTCTACAGCAGGTCATATTG 3'</p> <p>pRS TcGPI10 F: 5' GGGGAATTCATGTCTCCTTTGATTGTATTGTTCCCT 3'</p> <p>pRS TcGPI10 R: 5' GGGCTCGAGTTAATTGGCCTGAACAACATTTTCGTA 3'</p> <p>pRS TcGPI12 F: 5' GGGATCCATGTCCGTTTTTTTCGCTG 3'</p> <p>pRS TcGPI12 R: 5' TAAAGCTTCTAGGACGCCTTCAGTTC 3'</p> <p>pRS TcGPI14 F: 5' GGGGAATTCATGCCGTGCCAGTCAGATTGTTCTGTTGATC 3'</p> <p>pRS TcGPI14 R: 5' GGGCTCGAGCTACGCGAATTTGGTCATCTTTTCCC 3'</p> <p>pRS TcGAA1 F: 5' GGATCCATGTGCGATTGCCTTTTGC 3'</p> <p>pRS TcGAA1 R: 5' AAGCTTACATTGTTGGTAAAACCTGATC 3'</p> <p>pRS TcIPCS F: 5' GGGGAATTCATGGTTTTAATGGGGCCTCATTC 3'</p> <p>pRS TcIPCS R: 5' TCTCTCGAGTACCAGTGTCCAAAATCCCAC 3'</p> <p>pRS ScDPM1 F: 5' GGGACTAGTATGAGCATCGAATACTCTGT 3'</p> <p>pRS ScDPM1 R: 5' GGGGGATCCCTAAAAGACCAAAATGGTATAG 3'</p> <p>pRS ScGPI3 F: 5' GGGACTAGTATGGCTTCAATATAGCGTATGTC 3'</p> <p>pRS ScGPI3 R: 5' CCCCTCGAGAGTTTCTTCTGCTTCCCTCGTCTC 3'</p> <p>pRS ScGPI8 F: 5' TTTGGATCCATGCGTATAGCGATGCATCT 3'</p> <p>pRS ScGPI8 R: 5' GGCAAGCTTTTAATTAGTGTACAGGTCATA 3'</p> <p>pRS ScGPI10 F: 5' GGGACTAGTATGGCTCACGAGTTTCATAGAATAAA 3'</p> <p>pRS ScGPI10 R: 5' GGGCTCGAGAATATCTGCCGCTGGAATATCGCTAT 3'</p> <p>pRS ScGPI12 F: 5' GGGACTAGTATGAAGATGTTGAGGCGTACAAAGGT 3'</p> <p>pRS ScGPI12 R: 5' GGGCTCGAGATATGTATAAACATCAAATTCATTAA 3'</p> <p>pRS ScGPI14 F: 5' GGGACTAGTATGACTGGCGAAGAATGGGGCTTGA 3'</p> <p>pRS ScGPI14 R: 5' GGGCTCGAGGTTGTTCTTTTGTGGAAACTGTGG 3'</p> <p>pRS ScGAA1 F: 5' TTTGGATCCATGGCCTTATTGGAGAAGTT 3'</p> <p>pRS ScGAA1 R: 5' GGCAAGCTTCAACTTTGCTTTTCTTTTCGA 3'</p> <p>pRS ScAUR1 F: 5' TCTACTAGTATGGCAAACCCCTTTTTCGAGATG 3'</p> <p>pRS ScAUR1 R: 5' GCGAAGCTTTTAAGCCCTCTTTACACCTAGTG 3'</p> |
| Cellular localization in <i>T. cruzi</i> | <p>pTREG TcDPM1 F: 5' GGGTCTAGAATGCCAATCAGCTACACCATAG 3'</p> <p>pTREG TcDPM1 R: 5' CCCGAATTCACGACCTGTTTTCACAGCCC 3'</p> <p>pTREG TcGPI3 F: 5' GGGTCTAGAATGGGAAGACACCGCGTGGCACT 3'</p> <p>pTREG TcGPI3 R: 5' CCCGAATTCACACCCCTTCTCAAGAGCATTAA 3'</p> <p>pTREG TcGPI12 F: 5' GGGTCTAGAATGTCCGTTTTTTTCGCTGTGAC 3'</p> <p>pTREG TcGPI12 R: 5' CCCGAATTCGGACGCTTTCAGTTCCCTTAGCT 3'</p>                                                                                                                                                                                                                                                                                                                                                                                                                                                                                                                                                                                                                                                                                                                                                                                                                                                                                                                                                                                                                                                                                                                                                                                                                                                                                                                                                                                                                                                                                                                                                                              |
| Cellular localization in mammalian cells | <p>pcDNA TcDPM1 F: 5' GGGGCTAGCTGCCAATCAGCTACACCATAG 3'</p> <p>pcDNA TcDPM1 R: 5' CCCTCTAGACACGACCTGTTTTCACAGCCC 3'</p> <p>pcDNA TcGPI3 F: 5' GGGGGTACCGGGAAGACACCGCGTGGCACTGG 3'</p> <p>pcDNA TcGPI3 R: 5' CCCTCTAGAACACCCCTTCTCAAGAGCATTAA 3'</p> <p>pcDNA TcGPI12 F: 5' GGGGCTAGCTGTCCGTTTTTTTCGCTGTGAC 3'</p> <p>pcDNA TcGPI12 R: 5' CCCTCTAGAGGACGCTTTCAGTTCCCTTAGC 3'</p> <p>pcDNA TcGPI8 F: 5' GGGGCTAGCTGAAGCGTCAGATGGGGGTTTTG 3'</p> <p>pcDNA TcGPI8 R: 5' CCCTCTAGACAGCAGGTCATATTGTACATCCA 3'</p>                                                                                                                                                                                                                                                                                                                                                                                                                                                                                                                                                                                                                                                                                                                                                                                                                                                                                                                                                                                                                                                                                                                                                                                                                                                                                                                                                                                                                                                    |
| Knockout constructions                   | <p>GPI8/SacI 5'F: 5' TGAGCTCTGGGAGTGAGGGTGGCTGCGAG 3'</p> <p>GPI8/SpeI 5'R: 5' ACTAGTAACTCTCCTATGATGCTGCTTTG 3'</p> <p>GPI8/XhoI 3'F: 5' TCTCGAGCATGCAAAGTGTGAAGTCGGACC 3'</p> <p>GPI8/XbaI 3'R: 5' CTCTAGATTCCTTGTGCTTTGCTCTTATC 3'</p> <p>GPI8-AI2/KpnI 5'F: 5' TTTGGTACCCTTGTACATGCCATTTTCCA 3'</p> <p>GPI8-AI2/SpeI 5'R: 5' GGGACTAGTGCAGAGATGGTAAATTTGTCAGT 3'</p> <p>GPI8-AI2/EcoRV 3'F: 5' GGGGATATCCTCACGCTGGTCACTTGAATC 3'</p> <p>GPI8-AI2/XhoI 3'R: 5' TTTCTCGAGTGAAGTGCATGCTTCCAAGC 3'</p> <p>GPI8 ext 5'F: 5' GTAACACAATCGTTTTTAGGCTGTG 3' (Primer 1F)</p> <p>GPI8 ext 3'R: 5' CAGATGAGGAAAGAGACGAACAG 3' (Primer 2R)</p> <p>GPI8 int 5'R: 5' GGCGTATATTAAGAAGTAGCGTGA 3' (Primer 7R)</p> <p>GPI8 int 5'R2: 5' ATGAGAGTTTTTCATCCGTGTTGAG 3' (Primer 8R)</p> <p>Neo For: 5' CGACCCTGCAGCCAATATGGGATC 3' (Primer 3F)</p> <p>Neo Rev: 5' TCAGAAGAACTCGTCAAGAAGGCG 3' (Primer 3R)</p> <p>Neon11: 5' CGGCCGAGAACCTGCGTGCAA 3' (Primer 1R)</p> <p>Neon20: 5' GGATTCATCGACTGTGGCCGGC 3' (Primer 2F)</p> <p>Hyg For: 5' ATGAAAAGCCTGAACCTACCCG 3' (Primer 6F)</p> <p>Hyg Rev: 5' TCAGAAGAACTCGTCCGGCCACA 3' (Primer 6R)</p> <p>Hygn11: 5' GAGCTGCATCAGGTCGGAGACGC 3' (Primer 4R)</p> <p>Hygn20: 5' ACCGATGGCTGTGTAAGTAC 3' (Primer 5F)</p>                                                                                                                                                                                                                                                                                                                                                                                                                                                                                                                                                                                                                                                                                                                 |
